# Supplementary material for: The m6A RNA Demethylase ALKBH5 Promotes Radioresistance and Invasion Capability of Glioma Stem Cells
Source: Cancers (Basel). 2020 Dec 25;13(1):40. doi: 10.3390/cancers13010040 (PMC7795604; doi:10.3390/cancers13010040)
Supplement: Supplementary file 1 [file cancers-13-00040-s001.zip › cancers-1025874-Table S1.xlsx]

## Sheet: C5 _ Up_FC0_5
Table S1 : Molecular signatures associated with high ALKBH5 expression in TCGA database.
Pathway FE Pvalue ZE Pvalue Number of common genes Common Genes
GO_EXTRACELLULAR_MATRIX 7.13e-34 1.09e-28 88/531 SPON2 EMILIN1 CHI3L1 VASN COL1A1 COL1A2 COL5A1 COL6A1 COL6A2 COL6A3 COL13A1 LRRC15 CTSD CTSZ AEBP1 DPT ECM1 F13A1 EFEMP1 FMOD MXRA5 AMBP SRPX2 GPC1 ANG EFEMP2 ANXA11 TNC ICAM1 ADAMTSL5 IGFALS VWC2 LAMA5 LGALS1 LGALS3 LGALS3BP LOX LOXL1 LOXL2 LTBP2 LTBP3 MDK MFAP2 MFAP4 ACHE MMP1 MMP7 MMP9 MMP13 MMP14 MMP19 SERPINE1 SERPINA5 PCOLCE SERPINA1 PI3 PRTN…
GO_COLLAGEN_CONTAINING_EXTRACELLULAR_MATRIX 9.83e-29 1.72e-23 71/408 EMILIN1 COL1A1 COL1A2 COL5A1 COL6A1 COL6A2 COL6A3 COL13A1 LRRC15 CTSD CTSZ AEBP1 DPT ECM1 F13A1 EFEMP1 FMOD MXRA5 AMBP SRPX2 GPC1 ANG EFEMP2 ANXA11 TNC ICAM1 VWC2 LAMA5 LGALS1 LGALS3 LGALS3BP LOXL1 LOXL2 LTBP2 LTBP3 MDK MFAP2 MFAP4 ACHE MMP9 SERPINE1 SERPINA5 PCOLCE SERPINA1 PRTN3 RARRES2 S100A4 S100A9 BGN VWA1 SOD3 TGFB1 TGFB1I…
GO_EXTRACELLULAR_STRUCTURE_ORGANIZATION 3.47e-27 1.19e-20 66/373 ADAM8 EMILIN1 COL1A1 COL1A2 COL5A1 COL6A1 COL6A2 COL6A3 COL13A1 ADAMTS14 AEBP1 DPT ENG FMOD B4GALT1 EFEMP2 TNC IBSP ICAM1 ICAM4 IL6 ITGA3 ITGA5 ITGA7 ITGB2 ITGB3 ITGB4 ITGB5 ITGB7 LAMA5 LOX LOXL1 LOXL2 MFAP2 MFAP4 MMP1 MMP7 MMP9 MMP13 MMP14 MMP19 MYF5 NFKB2 FURIN SERPINE1 PLOD1 PTX3 BCL3 BGN VWA1 SPINT1 TGFB1 TGFBI THBS1 TIMP1 TNFRS…
GO_EXTRACELLULAR_MATRIX_STRUCTURAL_CONSTITUENT 6.30e-15 2.39e-14 32/165 EMILIN1 CHI3L1 COL1A1 COL1A2 COL5A1 COL6A1 COL6A2 COL6A3 COL13A1 AEBP1 DPT ECM1 EFEMP1 FMOD MXRA5 SRPX2 EFEMP2 TNC LAMA5 LTBP2 MFAP2 MFAP4 PCOLCE BGN VWA1 TGFBI THBS1 TFPI2 MFAP5 COL18A1 SRPX COL27A1
GO_COLLAGEN_METABOLIC_PROCESS 6.78e-16 7.41e-12 28/115 EMILIN1 COL1A1 COL1A2 COL5A1 COL13A1 ADAMTS14 CTSD ENG IL6 MFAP4 MMP1 MMP7 MMP9 MMP13 MMP14 MMP19 FURIN PLOD1 PRTN3 CBX8 RCN3 TGFB1 UCN VIM SERPINH1 PLOD3 CREB3L1 MRC2
GO_SECRETORY_GRANULE 1.55e-17 8.42e-11 84/835 SIGLEC14 ADAM8 FSTL3 TCIRG1 VAT1 AGPAT2 LILRB3 CHI3L1 CHRNB4 CNN2 COL1A1 TMEM190 CTSD CTSZ DEFA5 ECM1 F13A1 ALOX5 GAA BACE2 GALNS RAB11FIP5 B4GALT1 DKKL1 SIGLEC9 GRN ANPEP PYCARD GSN DPP7 ANXA11 HSPA6 ISLR ITGB2 ITGB3 ITPR3 TBC1D10C RHOG LGALS3 LGALS3BP LOXL1 LTF ARSA MME MMP9 SERPINE1 SERPINA5 GAL CALML5 PFKL SERPINA1 PLA2G2A PLAU PLAUR PRTN3 AZU1 RE…
GO_BIOLOGICAL_ADHESION 2.21e-20 2.79e-10 124/1425 SIGLEC14 PTPRU ADAM8 CDH15 FSTL3 TNIP1 MYL9 SPON2 CEBPB EMILIN1 B4GALNT2 COL1A1 VSTM2L COL5A1 COL6A1 COL6A2 COL6A3 COL13A1 LRRC15 CLDN7 DAPK3 DPT ENG ERBB2 FCGR2B SDK1 FES PLXND1 FLNA STAB1 PLXNB2 AMBP B4GALT1 SIGLEC9 SRPX2 CRB2 PYCARD GSN PARVB HSPB1 TNC IBSP ICAM1 ICAM4 IGFALS IGFBP2 IL2RA IL6 IRAK1 ISLR ITGA3 ITGA5 ITGA7 ITGB2 ITGB3 ITGB4 ITGB5…
GO_CELL_SUBSTRATE_JUNCTION 5.31e-15 1.57e-09 52/414 ARPC1B CFL1 CNN1 CNN2 ENG FES FLII FLNA FLNC GNB2 GSN PARVB HMGA1 HSPB1 TNC ICAM1 ITGA3 ITGA5 ITGB2 ITGB3 ITGB4 ITGB5 ITGB7 ARF1 RHOG LIMK1 MME MMP14 P4HB PLAU PLAUR FBLIM1 MAP2K2 CORO1B PXN RAC2 TRPV4 RRAS SDC4 TGFB1I1 TGM2 TRIP6 VASP VIM ZYX FZD1 CAV1 ACTN1 PDLIM7 CD44 CD151 MRC2
GO_GROWTH_FACTOR_BINDING 5.61e-13 3.78e-09 27/137 VASN COL1A1 COL1A2 COL5A1 COL6A1 ENG ERBB2 SRPX2 GPC1 IGFALS IGFBP2 IGFBP3 IGFBP4 IGFBP5 IGFBP6 IL1R1 IL2RA ITGB3 ITGB4 LTBP2 LTBP3 FURIN FGFRL1 SHC1 THBS1 RHBDF2 HAP1
GO_ENDOPLASMIC_RETICULUM_LUMEN 3.86e-11 6.15e-09 38/306 FSTL3 PDIA5 PRSS23 COL1A1 COL1A2 COL5A1 COL6A1 COL6A2 COL6A3 COL13A1 CTSZ P4HA3 TNC ARSI IGFBP3 IGFBP4 IGFBP5 IL6 LGALS1 ARSA NUCB1 P4HB SERPINA1 PLAUR MXRA8 PNPLA2 RCN3 PTGS2 FKBP10 VWA1 THBS1 TIMP1 COL18A1 COL27A1 SERPINH1 P4HA2 PLOD3 ADAMTSL1
GO_ANCHORING_JUNCTION 6.77e-15 8.87e-09 78/823 PTPRU ARPC1B CDH15 NDRG1 CFL1 PARK7 SYNPO WTIP CNN1 CNN2 COL13A1 CLDN7 ENG FES FLII FLNA FLNC B4GALT1 GJB2 GNB2 GSN PARVB HMGA1 HSPB1 TNC ICAM1 ITGA3 ITGA5 ITGB2 ITGB3 ITGB4 ITGB5 ITGB7 ARF1 RHOG LIMK1 MME MMP14 P4HB PLAU PLAUR FXYD1 FGFRL1 MXRA8 FBLIM1 PPL PRKCG MAP2K2 CORO1B HAMP PXN RAC2 TRPV4 RRAS S100A11 SDC4 SLC2A1 TGFB1I1 TGM2 TRIP6 VASP VEGFA…
GO_SECRETORY_VESICLE 2.71e-15 9.16e-09 89/998 SIGLEC14 ADAM8 FSTL3 TCIRG1 VAT1 AGPAT2 GIPC1 LILRB3 CHI3L1 CHRNB4 CNN2 COL1A1 TMEM190 CTSD CTSZ DEFA5 ECM1 F13A1 ALOX5 GAA BACE2 GALNS RAB11FIP5 B4GALT1 DKKL1 SIGLEC9 GRN ANPEP GRIN1 PYCARD GSN DPP7 ANXA11 HSPA6 ISLR ITGB2 ITGB3 ITPR3 TBC1D10C RHOG LGALS3 LGALS3BP LOXL1 LTF ARSA MME MMP9 SERPINE1 SERPINA5 GAL CALML5 PFKL SERPINA1 PLA2G2A PLAU PLAUR M…
GO_SIGNALING_RECEPTOR_BINDING 9.72e-18 6.96e-08 128/1611 STUB1 CCL26 CEBPB GAS2L1 CFL1 GIPC1 ARID5A EMILIN1 PARK7 RLN3 COL5A1 ADM CRH CTF1 ADRA2A DDT ECM1 ENG ERBB2 EREG EFEMP1 FES FGF3 FGF11 DKK1 FLNA CLCF1 DKKL1 SRPX2 GNA15 ANG IGHV4-31 METRNL MCHR1 GRB10 GRN GRIN1 PYCARD OSGIN1 HMGA1 IBSP ICAM1 ICAM4 IGFBP2 IGFBP4 IGFBP6 IL1R1 IL6 ITGA3 ITGA5 ITGB2 ITGB3 ITGB4 ITGB5 ITGB7 JUND LAMA5 LBP LGALS3…
GO_LEUKOCYTE_MIGRATION 5.80e-15 8.60e-08 58/502 ADAM8 CCL26 EMILIN1 COL1A1 COL1A2 DDT ECM1 SLC7A8 B4GALT1 GPC1 PYCARD HMOX1 ICAM1 IL1R1 IL6 ITGA3 ITGA5 ITGB2 ITGB3 ITGB7 RHOG LBP LGALS3 MDK MMP1 MMP14 ROR2 SERPINE1 TREM1 PRTN3 AZU1 RAC2 RARRES2 TRPV4 BDKRB1 S100A9 CCL13 CCL20 SDC1 SDC4 MYO1G SHC1 TGFB1 THBD THBS1 TRPM2 C5AR1 VEGFA VEGFB HSD3B7 CAV1 TNFRSF11A CH25H DOK2 SLC16A3 CXCL14 CD44 CD74
GO_EXOCYTOSIS 3.99e-15 1.08e-07 83/900 SIGLEC14 ADAM8 TCIRG1 VAT1 AGPAT2 GIPC1 LILRB3 CHI3L1 CHRNB4 CNN2 ADRA2A CTSD CTSZ ECM1 F13A1 FCGR2B FES FLNA ALOX5 GAA GALNS RAB11FIP5 B4GALT1 SIGLEC9 GRN ANPEP PYCARD GSN DPP7 HMOX1 HSPA6 ISLR ITGB2 ITGB3 TBC1D10C ARF1 RHOG LGALS3 LGALS3BP LTF ARSA MME MMP9 SERPINE1 CALML5 PFKL SERPINA1 PLAU PLAUR PRKCG PRTN3 AZU1 RETN PTX3 TRAPPC1 RAB3A RAC2 RARRES2 S100A…
GO_COLLAGEN_BINDING 2.52e-09 1.68e-07 16/69 COL6A1 COL6A2 LRRC15 AEBP1 ITGA3 LOX ACHE MMP9 MMP13 PCOLCE TGFBI THBS1 SERPINH1 CD44 SPOCK2 MRC2
GO_INFLAMMATORY_RESPONSE 1.17e-16 2.08e-07 78/765 ADAM8 TCIRG1 TNIP1 CCL26 CEBPB CHI3L1 PARK7 ADM CRH DDT ECM1 ABCD1 FCGR2B SBNO2 STAB1 ALOX5 BACE2 B4GALT1 METRNL GRN PYCARD HMOX1 ICAM1 IGFBP4 IL1R1 IL2RA IL6 ITGB2 LBP MDK MMP9 ASS1 NFATC4 NFKB2 NFKBIA OSM SERPINE1 GAL SERPINA1 PLA2G2A ACP5 TREM1 MAP2K3 AZU1 PTGS2 HAMP PTX3 RARRES2 TRPV4 RELB BDKRB1 BDKRB2 S100A9 CCL13 CCL20 SDC1 TACR1 TGFB1 TGM2…
GO_SECRETION 9.68e-19 3.45e-07 134/1680 SIGLEC14 ADAM8 TCIRG1 VAT1 AGPAT2 GIPC1 LILRB3 CHI3L1 PARK7 CHRNB4 CNN2 ADM CRH ADRA2A CTSD CTSZ DRD4 ECM1 ENG F13A1 FCGR2B FES FLNA ALOX5 GAA GALNS RAB11FIP5 B4GALT1 FOXB1 SIGLEC9 ANG FFAR1 GRN ANPEP PYCARD GSN DPP7 HK2 HMOX1 HSPA6 IL6 PDX1 AQP9 ISLR ITGB2 ITGB3 ITPR3 TBC1D10C ARF1 KCNN4 RHOG LGALS3 LGALS3BP LIF LTBP2 LTF ARSA MDK ACHE MME MMP9 NTSR1 OSM P…
GO_COLLAGEN_CATABOLIC_PROCESS 7.96e-08 4.39e-07 12/47 COL13A1 ADAMTS14 CTSD MMP1 MMP7 MMP9 MMP13 MMP14 MMP19 FURIN PRTN3 MRC2
GO_MYELOID_LEUKOCYTE_ACTIVATION 1.26e-13 5.99e-07 65/650 SIGLEC14 ADAM8 TCIRG1 NDRG1 VAT1 AGPAT2 LILRB3 CHI3L1 CHRNB4 CNN2 CTSD CTSZ FCGR2B FES SBNO2 ALOX5 GAA GALNS B4GALT1 SIGLEC9 GRN ANPEP PYCARD GSN DPP7 HMOX1 HSPA6 IL6 ITGB2 TBC1D10C RHOG LBP LGALS3 LTBR LTF ARSA MME MMP9 CALML5 PFKL SERPINA1 PLAU PLAUR PRTN3 AZU1 RETN PTX3 TRAPPC1 RAB3A RAC2 RELB S100A9 S100A11 SPI1 THBS1 C1QA TNFRSF1B TRPM…
GO_EXTRACELLULAR_MATRIX_BINDING 1.13e-08 7.86e-07 14/57 LRRC15 ECM1 GPC1 ITGA3 ITGB3 LGALS1 LGALS3 ACHE CD248 BGN TGFBI THBS1 VEGFA SPOCK2
GO_MYELOID_LEUKOCYTE_MEDIATED_IMMUNITY 3.15e-12 8.25e-07 56/549 SIGLEC14 ADAM8 TCIRG1 SPON2 VAT1 AGPAT2 LILRB3 CHI3L1 CHRNB4 CNN2 CTSD CTSZ FCGR2B FES ALOX5 GAA GALNS B4GALT1 SIGLEC9 GRN ANPEP PYCARD GSN DPP7 HMOX1 HSPA6 IL6 ITGB2 TBC1D10C RHOG LGALS3 LTF ARSA MME MMP9 CALML5 PFKL SERPINA1 PLAU PLAUR PRTN3 AZU1 RETN PTX3 TRAPPC1 RAB3A RAC2 S100A9 S100A11 TNFRSF1B TRPM2 C5AR1 GHDC CD44 CD68 MVP
GO_VESICLE_LUMEN 7.29e-11 9.29e-07 39/327 VAT1 CHI3L1 CNN2 CTSD CTSZ DEFA5 ECM1 F13A1 ALOX5 GALNS GRN PYCARD GSN DPP7 HSPA6 ISLR LGALS3BP LTF ARSA SERPINE1 PFKL SERPINA1 PRTN3 AZU1 RETN PTX3 TRAPPC1 RARRES2 S100A9 S100A11 TGFB1 THBS1 TIMP1 SERPING1 VEGFA VEGFB GHDC ACTN1 MVP
GO_FIBRONECTIN_BINDING 1.84e-08 1.58e-06 10/27 FSTL3 LRRC15 IGFBP3 IGFBP5 IGFBP6 ITGA3 ITGB3 SDC4 THBS1 VEGFA
GO_INSULIN_LIKE_GROWTH_FACTOR_I_BINDING 1.16e-07 2.67e-06 7/13 IGFBP2 IGFBP3 IGFBP4 IGFBP5 IGFBP6 ITGB3 ITGB4
GO_COLLAGEN_FIBRIL_ORGANIZATION 6.22e-08 4.20e-06 13/55 EMILIN1 COL1A1 COL1A2 COL5A1 ADAMTS14 AEBP1 DPT FMOD LOX LOXL2 PLOD1 SERPINH1 PLOD3
GO_ANATOMICAL_STRUCTURE_FORMATION_INVOLVED_IN_MORPHOGENESIS 1.27e-16 4.29e-06 102/1177 ADAM8 TCIRG1 CFL1 EMILIN1 CHI3L1 HSPB6 COL1A1 COL5A1 COL6A1 ADM RDH10 ECM1 ENG ERBB2 EREG ETV2 SDK1 SBNO2 DKK1 PLXND1 STAB1 PLXNB2 B4GALT1 FOXB1 SRPX2 GPC1 ANG CRB2 GRN ANPEP EHD2 HK2 HMOX1 HSPB1 IL6 ITGA3 ITGA5 ITGA7 ITGB2 ITGB3 ITGB4 ITGB5 JUNB LAMA5 LOXL2 MDK MMP9 MMP14 MMP19 MYF5 NFATC4 NFKB2 NOTCH3 ROR2 SE…
GO_STRUCTURAL_MOLECULE_ACTIVITY 1.28e-06 6.78e-06 50/670 ARPC1B MYL9 EMILIN1 CHI3L1 HSPB6 COL1A1 COL1A2 COL5A1 COL6A1 COL6A2 COL6A3 COL13A1 CLDN7 CRYBA1 AEBP1 DPT ECM1 EFEMP1 FMOD MXRA5 SRPX2 EFEMP2 HMGA1 TNC LAMA5 LTBP2 MFAP2 MFAP4 MYBPC2 MYBPH PCOLCE PI3 PPL BGN VWA1 SPAG4 TGFBI THBS1 TPM2 TUBA4A VIM TFPI2 MFAP5 COL18A1 SRPX TUBB6 COL27A1 ACTN1 CLDN9 KRT75
GO_EXTRACELLULAR_MATRIX_STRUCTURAL_CONSTITUENT_CONFERRING_TENSILE_STRENGTH 1.31e-05 9.78e-06 9/41 COL1A1 COL1A2 COL5A1 COL6A1 COL6A2 COL6A3 COL13A1 COL18A1 COL27A1
GO_RESPONSE_TO_CYTOKINE 5.93e-15 1.18e-05 100/1210 TCIRG1 CCL26 CEBPB CEBPD AGPAT2 CFL1 GIPC1 CHI3L1 CNN2 COL1A1 COL1A2 CTF1 DAPK3 ECM1 EREG F13A1 SBNO2 CLCF1 ALOX5 CCR10 PYCARD GSN HK2 HMOX1 ICAM1 IL1R1 IL2RA IL6 PDX1 IRAK1 IRF7 ITGB2 JAK3 JUNB JUND ARF1 LAMA5 LBP LIF LOX LTBR MME MMP1 MMP9 ASS1 MYO1C NFKB2 NFKBIA OSM P4HB IL21R PCOLCE TNFRSF12A PLP2 ACP5 RAB20 PRTN3 PTGS2 HAMP PTPRN REG1A RELB …
GO_CELL_JUNCTION 3.02e-11 1.47e-05 96/1313 PTPRU ARPC1B CDH15 NDRG1 CFL1 LZTS1 PARK7 SYNPO CHRNB4 GRIN3B WTIP CNN1 CNN2 COL13A1 CLDN7 CNIH3 ENG SDK1 FES FLII FLNA FLNC B4GALT1 GJB2 SRPX2 GNB2 GRIN1 GSN PARVB HMGA1 HSPB1 TNC ICAM1 ITGA3 ITGA5 ITGB2 ITGB3 ITGB4 ITGB5 ITGB7 ARF1 VWC2 RHOG LIMK1 ACHE MME MMP14 P4HB PLAU PLAUR FXYD1 FGFRL1 MXRA8 FBLIM1 PPL CHRNA9 PRKCG MAP2K2 PAK6 CORO1B HAMP PTPRN PX…
GO_COLLAGEN_TRIMER 1.50e-05 1.50e-05 13/87 EMILIN1 COL1A1 COL1A2 COL5A1 COL6A1 COL6A2 COL6A3 COL13A1 LOX C1QA COL18A1 COL27A1 MARCO
GO_INSULIN_LIKE_GROWTH_FACTOR_II_BINDING 3.22e-06 1.53e-05 5/8 IGFBP2 IGFBP3 IGFBP4 IGFBP5 IGFBP6
GO_TUBE_DEVELOPMENT 3.33e-16 1.54e-05 98/1122 ADAM8 FSTL3 CFL1 EMILIN1 CHI3L1 HSPB6 ADM CRH CTSZ RDH10 ECM1 ENG ERBB2 EREG ETV2 FOXE1 PLXND1 STAB1 PLXNB2 FKBP8 B4GALT1 FOXB1 GJB2 SRPX2 ANG GRN ANPEP HK2 HMOX1 HSPB1 TNC IGFBP5 IL6 PDX1 ITGA3 ITGA5 ITGB2 ITGB3 ITGB4 JUNB LAMA5 LIF LOX LOXL2 LTBP3 MDK MET MME MMP14 MMP19 ASS1 NFATC4 NOTCH3 SERPINE1 ANGPTL4 TNFRSF12A MAP2K2 RCN3 PTGS2 RAB3A RARRES2 R…
GO_BONE_MORPHOGENESIS 2.43e-08 1.72e-05 19/113 COL1A1 COL6A1 COL6A2 COL6A3 COL13A1 IFITM5 SP5 LTBP3 LTF MMP13 MMP14 NAB2 ACP5 POR TRPV4 VWA1 STC1 COL27A1 SERPINH1
GO_CELL_ACTIVATION_INVOLVED_IN_IMMUNE_RESPONSE 6.87e-12 2.09e-05 65/710 SIGLEC14 ADAM8 TCIRG1 VAT1 AGPAT2 LILRB3 CHI3L1 CHRNB4 CNN2 CTSD CTSZ FCGR2B FES SBNO2 CLCF1 ALOX5 GAA GALNS B4GALT1 SIGLEC9 GRN ANPEP PYCARD GSN DPP7 HMOX1 HSPA6 ICAM1 IL6 ITGB2 JAK3 TBC1D10C RHOG LBP LGALS1 LGALS3 LTF ARSA MDK MME MMP9 CALML5 PFKL SERPINA1 PLAU PLAUR PRTN3 AZU1 RETN PTX3 TRAPPC1 RAB3A RAC2 RELB BCL3 S100A9 …
GO_GROWTH_FACTOR_COMPLEX 8.46e-06 2.45e-05 4/5 IGFALS IGFBP3 IGFBP5 IGFBP6
GO_ENDOPLASMIC_RETICULUM 5.73e-08 3.32e-05 90/1392 FSTL3 STUB1 AGPAT2 PDIA5 PRSS23 CHI3L1 MGAT4B PARK7 COL1A1 COL1A2 GOLT1A COL5A1 COL6A1 COL6A2 COL6A3 COL13A1 CRABP2 CTSZ LCTL PPP1R15A RAB38 FKBP8 ZDHHC24 BACE2 CCR10 P4HA3 GRN GRIN1 PYCARD ZDHHC1 HK2 HMOX1 TNC ARSI IGFBP3 IGFBP4 IGFBP5 IL6 ITGA5 ITPR3 LGALS1 LOXL2 ARSA ASS1 NTSR1 NUCB1 P4HB FURIN RASD1 SERPINA1 PLA2G2A PLAUR PLOD1 PLP2 MXRA8 FAM…
GO_CARTILAGE_DEVELOPMENT 3.00e-09 3.53e-05 28/210 CHI3L1 COL1A1 COL6A1 COL6A2 COL6A3 ECM1 EFEMP1 LOXL2 LTBP3 MDK MMP13 MYF5 ROR2 PITX1 POR TRPV4 BGN VWA1 SNAI1 STC1 TGFB1 TGFBI TIMP1 HMGA2 COL27A1 RUNX1 SERPINH1 CD44
GO_CARTILAGE_DEVELOPMENT_INVOLVED_IN_ENDOCHONDRAL_BONE_MORPHOGENESIS 7.22e-07 4.43e-05 11/47 COL1A1 COL6A1 COL6A2 COL6A3 MMP13 POR TRPV4 VWA1 STC1 COL27A1 SERPINH1
GO_NEGATIVE_REGULATION_OF_PEPTIDASE_ACTIVITY 1.25e-07 4.70e-05 29/264 PARK7 COL6A3 ECM1 AMBP SFN CRB2 LTF MMP9 FURIN SERPINE1 SERPINA5 SERPINA1 PI3 PLAUR POR PTGS2 RARRES1 RENBP SPINK1 SPINT1 THBS1 TIMP1 SERPING1 VEGFA TFPI2 SERPINH1 NOL3 CD44 SPOCK2
GO_ENDOCHONDRAL_BONE_MORPHOGENESIS 3.17e-07 4.76e-05 14/73 COL1A1 COL6A1 COL6A2 COL6A3 COL13A1 MMP13 MMP14 NAB2 POR TRPV4 VWA1 STC1 COL27A1 SERPINH1
GO_INSULIN_LIKE_GROWTH_FACTOR_BINDING 6.44e-06 5.25e-05 8/29 IGFALS IGFBP2 IGFBP3 IGFBP4 IGFBP5 IGFBP6 ITGB3 ITGB4
GO_CELL_ACTIVATION 8.18e-15 5.37e-05 112/1442 SIGLEC14 ADAM8 TCIRG1 NDRG1 MYL9 VAT1 CEBPB AGPAT2 LILRB3 EMILIN1 CHI3L1 CHRNB4 CNN2 COL1A1 COL1A2 ADRA2A CTSD CTSZ ELF4 ERBB2 FCGR2B FES SBNO2 FLNA CLCF1 ALOX5 GAA BACE2 GALNS B4GALT1 SIGLEC9 GNA15 IGHV4-31 GRN ANPEP PYCARD GSN DPP7 HMOX1 HSPA6 HSPB1 ICAM1 IGFBP2 IL2RA IL6 ITGB2 ITGB3 ITPR3 JAK3 TBC1D10C RHOG LBP LGALS1 LGALS3 LTBR LTF LYL1 ARSA MDK …
GO_INTEGRIN_BINDING 9.39e-08 5.46e-05 20/135 EMILIN1 COL5A1 IBSP ICAM1 ICAM4 ITGA3 ITGA5 ITGB2 ITGB3 ITGB4 ITGB5 ITGB7 LAMA5 MMP14 P4HB PXN TGFBI THBS1 ACTN1 CD151
GO_CYTOKINE_MEDIATED_SIGNALING_PATHWAY 4.89e-12 5.48e-05 70/791 CCL26 CEBPD AGPAT2 CFL1 CNN2 COL1A2 CTF1 ECM1 EREG F13A1 CLCF1 ALOX5 CCR10 PYCARD HMOX1 ICAM1 IL1R1 IL2RA IL6 IRAK1 IRF7 ITGB2 JAK3 JUNB ARF1 LAMA5 LBP LIF LTBR MMP1 MMP9 NFKBIA OSM P4HB IL21R TNFRSF12A PLP2 PRTN3 PTGS2 PTPRN CCL13 CCL20 SDC1 SHC1 SPI1 STX1A TGFB1 TIMP1 TNFRSF1A TNFRSF1B NR1H2 VEGFA VIM IKBKG CAV1 RUNX1 SOCS1 IRS2 TR…
GO_PROTEIN_COMPLEX_INVOLVED_IN_CELL_ADHESION 2.47e-06 5.57e-05 9/34 EMILIN1 ITGA3 ITGA5 ITGA7 ITGB2 ITGB3 ITGB4 ITGB5 ITGB7
GO_BASEMENT_MEMBRANE 8.39e-06 5.92e-05 14/95 COL5A1 ANG EFEMP2 TNC VWC2 LAMA5 LOXL1 LOXL2 ACHE VWA1 TGFBI TIMP1 COL18A1 CD151
GO_VACUOLAR_LUMEN 1.24e-06 6.85e-05 21/172 VAT1 TPP1 CTSD FMOD GAA GALNS GPC1 GRN PYCARD DPP7 ARSA NAGLU PRTN3 AZU1 RETN TRAPPC1 BGN SDC1 SDC4 SMPD1 CD74
GO_FIBRILLAR_COLLAGEN_TRIMER 4.03e-05 8.28e-05 5/12 COL1A1 COL1A2 COL5A1 COL27A1 MARCO
GO_LEUKOCYTE_MEDIATED_IMMUNITY 1.54e-10 8.49e-05 71/872 SIGLEC14 ADAM8 TCIRG1 SPON2 VAT1 AGPAT2 LILRB3 CHI3L1 CHRNB4 CNN2 CTSD CTSZ FCGR2B FES CLCF1 ALOX5 GAA GALNS B4GALT1 SIGLEC9 IGHV4-31 GRN ANPEP PYCARD GSN DPP7 HMOX1 HSPA6 ICAM1 IL1R1 IL6 IRF7 ITGB2 JAK3 TBC1D10C RHOG LGALS3 LTF ARSA MME MMP9 CALML5 PFKL SERPINA1 PLAU PLAUR PRTN3 AZU1 RETN PTX3 TRAPPC1 RAB3A RAC2 BCL3 S100A9 S100A11 MYO1G TG…
GO_CELL_SUBSTRATE_ADHESION 1.64e-09 8.99e-05 38/348 EMILIN1 COL1A1 COL13A1 DAPK3 FLNA PARVB ITGA3 ITGA5 ITGA7 ITGB2 ITGB3 ITGB4 ITGB5 ITGB7 VWC2 LAMA5 LGALS1 MDK MMP14 MYF5 NINJ1 SERPINE1 TNFRSF12A PLAU PXN RAC2 SDC4 MYO1G TGFB1I1 THBS1 TRIP6 VEGFA ZYX MICALL2 ACTN1 MYADM CD44 SPOCK2
GO_ACTOMYOSIN 5.07e-06 9.70e-05 13/79 MYL9 SYNPO CNN2 FBLIM1 CORO1B PXN STX1A TRIP6 ZYX MICALL2 PDLIM4 ACTN1 PDLIM7
GO_CELL_ADHESION_MOLECULE_BINDING 2.44e-08 1.02e-04 45/501 ADAM8 CDH15 NDRG1 GIPC1 EMILIN1 PARK7 TWF2 VASN CNN2 COL5A1 CLDN7 FLNA SFN IBSP ICAM1 ICAM4 ITGA3 ITGA5 ITGB2 ITGB3 ITGB4 ITGB5 ITGB7 LAMA5 MMP14 NOTCH3 P4HB FXYD5 PPL PAK6 CORO1B SCYL1 PXN S100A11 TGFBI THBS1 VASP EFHD2 CAPG TAGLN2 TNKS1BP1 ACTN1 GPRC5A NUMBL CD151
GO_COLLAGEN_BIOSYNTHETIC_PROCESS 3.33e-07 1.09e-04 12/53 EMILIN1 COL1A1 COL5A1 ENG IL6 CBX8 RCN3 TGFB1 UCN VIM SERPINH1 CREB3L1
GO_LAMININ_BINDING 6.44e-06 1.11e-04 8/29 LRRC15 ECM1 GPC1 ITGA3 LGALS1 LGALS3 ACHE THBS1
GO_MYELOID_LEUKOCYTE_MIGRATION 3.72e-09 1.11e-04 28/212 ADAM8 CCL26 EMILIN1 DDT IL1R1 IL6 ITGB2 RHOG LBP LGALS3 MDK MMP14 ROR2 SERPINE1 PRTN3 AZU1 RAC2 RARRES2 TRPV4 S100A9 CCL13 CCL20 THBS1 C5AR1 VEGFA VEGFB TNFRSF11A CD74
GO_ENDODERM_FORMATION 1.40e-06 1.34e-04 11/50 COL5A1 COL6A1 DKK1 ITGA5 ITGA7 ITGB2 ITGB5 MMP9 MMP14 HMGA2 SOX7
GO_PLATELET_DEGRANULATION 9.02e-07 1.52e-04 18/128 ECM1 F13A1 FLNA ISLR ITGB3 LGALS3BP SERPINE1 SERPINA1 RARRES2 TGFB1 THBS1 TIMP1 SERPING1 TUBA4A VEGFA VEGFB TAGLN2 ACTN1
GO_CARBOHYDRATE_BINDING 1.47e-04 1.55e-04 23/270 SIGLEC14 CHI3L1 GALNT5 ENG G6PD GAA GALK1 SIGLEC9 P4HA3 GYS1 HK2 LGALS1 LGALS3 LOXL2 PFKL PLOD1 CD248 PTX3 REG1A HKDC1 P4HA2 PLOD3 MRC2
GO_ACTIN_FILAMENT_BUNDLE 1.36e-05 1.61e-04 12/74 MYL9 SYNPO CNN2 FBLIM1 CORO1B PXN TRIP6 ZYX MICALL2 PDLIM4 ACTN1 PDLIM7
GO_MICROFIBRIL 3.07e-04 1.70e-04 4/10 ADAMTSL5 MFAP2 MFAP4 MFAP5
GO_POSITIVE_REGULATION_OF_LEUKOCYTE_MIGRATION 9.40e-09 1.72e-04 21/130 ADAM8 PYCARD ICAM1 IL1R1 IL6 LBP LGALS3 MDK MMP14 SERPINE1 RAC2 RARRES2 TRPV4 BDKRB1 CCL20 THBS1 C5AR1 VEGFA VEGFB CXCL14 CD74
GO_OSSIFICATION 1.82e-09 1.94e-04 41/396 FSTL3 TCIRG1 CEBPB CEBPD COL1A1 COL1A2 COL6A1 COL13A1 ECM1 SBNO2 DKK1 TNC IBSP IGFBP3 IGFBP5 IL6 JUNB JUND IFITM5 LOX LTBP3 LTF MDK ACHE MMP13 MMP14 MYF5 NAB2 ROR2 ACP5 PTGS2 RRBP1 SNAI1 STC1 TGFB1 FBXL15 FZD1 TNFRSF11A CREB3L1 PDLIM7 MRC2
GO_SERINE_TYPE_ENDOPEPTIDASE_INHIBITOR_ACTIVITY 1.24e-04 2.10e-04 12/92 COL6A3 AMBP FURIN SERPINE1 SERPINA5 SERPINA1 PI3 SPINK1 SPINT1 SERPING1 TFPI2 SERPINH1
GO_ENDOPEPTIDASE_REGULATOR_ACTIVITY 1.42e-05 2.29e-04 20/185 ADRM1 COL6A3 AMBP CRB2 LTF FURIN SERPINE1 SERPINA5 SERPINA1 PI3 RARRES1 RENBP SPINK1 SPINT1 TIMP1 SERPING1 TFPI2 SERPINH1 NOL3 SPOCK2
GO_PEPTIDASE_REGULATOR_ACTIVITY 6.73e-06 2.59e-04 23/222 ADRM1 COL6A3 AMBP CRB2 PYCARD LTF FURIN SERPINE1 SERPINA5 PCOLCE SERPINA1 PI3 RARRES1 RENBP SPINK1 SPINT1 TIMP1 SERPING1 TFPI2 CAV1 SERPINH1 NOL3 SPOCK2
GO_CELL_SURFACE 3.97e-09 2.82e-04 69/902 ADAM8 CDH15 VASN DCBLD2 CTSZ ENG FCGR2B PLXNB2 AMBP B4GALT1 SRPX2 GPC1 CCR10 IGHV4-31 ANPEP GRIN1 ICAM1 IL1R1 IL2RA ITGA3 ITGA5 ITGA7 ITGB2 ITGB3 ITGB4 ITGB5 ITGB7 LBP LGALS1 LGALS3 LTF MET ACHE MME MMP7 NOTCH3 ROR2 NTSR1 P4HB FURIN SERPINA5 TNFRSF12A PLAU PLAUR MXRA8 CD248 TRPV4 BGN SCNN1B SCNN1G SDC1 SDC4 SLC2A1 TGFB1 THBD THBS1 TNFRSF1A TPBG C5AR1 VEGFA…
GO_HYDROLASE_ACTIVITY_ACTING_ON_ACID_PHOSPHORUS_NITROGEN_BONDS 5.29e-04 2.83e-04 17/188 ADAM8 PRSS23 TPP1 TPSD1 DPP7 LTF ACHE MMP1 MMP7 MMP9 FURIN PLAU PRTN3 AZU1 CFB ST14 C2
GO_MONOSACCHARIDE_BINDING 5.49e-05 2.84e-04 11/72 ENG G6PD GALK1 P4HA3 GYS1 HK2 PFKL PLOD1 HKDC1 P4HA2 PLOD3
GO_POSITIVE_REGULATION_OF_LOCOMOTION 4.91e-12 3.24e-04 59/604 ADAM8 CCL26 COL1A1 LRRC15 CLDN7 ADRA2A DAPK3 FLNA SRPX2 GRN PYCARD HMOX1 HSPB1 ICAM1 IGFBP5 IL1R1 IL6 ITGA3 ITGA5 ITGB3 LBP LGALS3 MDK MET MMP9 MMP14 MYO1C ROR2 SERPINE1 PLAU MAP2K2 MAP2K3 AZU1 PTGS2 RAC2 RARRES2 TRPV4 BDKRB1 CCL20 FAM110C SNAI1 TACR1 TGFB1 THBS1 TRIP6 C5AR1 VEGFA VEGFB COL18A1 SYDE1 CAV1 IRS2 TRADD SPHK1 MYADM CXCL14 …
GO_REGULATION_OF_CELL_ADHESION 2.66e-12 3.28e-04 65/695 PTPRU ADAM8 FSTL3 CEBPB EMILIN1 B4GALNT2 COL1A1 CLDN7 DAPK3 ERBB2 FCGR2B FES PLXND1 FLNA PLXNB2 PYCARD GSN TNC IBSP ICAM1 IGFBP2 IL2RA IL6 IRAK1 ITGA3 ITGA5 ITGB2 JAK3 VWC2 LAMA5 LGALS1 LGALS3 ARHGDIA ARHGDIG MDK MMP14 ASS1 MYF5 NINJ1 SERPINE1 PLA2G2A PLAU FXYD5 TESC AZU1 RAC2 TRPV4 SDC4 SIPA1 TFE3 TGFB1 TGFBI TGM2 THBS1 SCGB1A1 VEGFA CD276 …
GO_ELASTIC_FIBER_ASSEMBLY 1.90e-04 3.32e-04 4/9 EMILIN1 EFEMP2 LOX MFAP4
GO_CONNECTIVE_TISSUE_DEVELOPMENT 2.32e-08 3.78e-04 31/274 CHI3L1 COL1A1 COL5A1 COL6A1 COL6A2 COL6A3 ECM1 EFEMP1 LOX LOXL2 LTBP3 MDK MMP13 MYF5 ROR2 PITX1 POR TRPV4 BGN VWA1 SNAI1 STC1 TGFB1 TGFBI TIMP1 HMGA2 COL27A1 RUNX1 SERPINH1 SLC39A13 CD44
GO_SECRETORY_GRANULE_MEMBRANE 1.58e-06 3.80e-04 29/298 SIGLEC14 ADAM8 TCIRG1 AGPAT2 LILRB3 CHRNB4 TMEM190 GAA B4GALT1 SIGLEC9 ANPEP ITGB2 ITGB3 ITPR3 TBC1D10C RHOG LGALS3 MME SERPINA5 PLAU PLAUR AZU1 RAB3A TNFRSF1B TRPM2 C5AR1 CAV1 CD44 CD68
GO_ENZYME_LINKED_RECEPTOR_PROTEIN_SIGNALING_PATHWAY 2.75e-12 3.86e-04 85/1051 PTPRU ARPC1B FSTL3 STUB1 TCIRG1 GIPC1 EMILIN1 VASN BTBD11 COL1A1 COL1A2 CTF1 ADRA2A ENG ERBB2 EREG ETV2 EFEMP1 FES FGF3 DKK1 FMOD FKBP8 GPC1 CRB2 GRB10 GRIN1 GUCY2D HSPB1 IGFBP2 IGFBP3 IGFBP4 IGFBP5 IGFBP6 IRAK1 ITGA3 ITGA5 ITGB3 ITGB5 JAK3 VWC2 LIF LOX LTBP2 LTBP3 MET MMP9 MYO1C NFATC4 ROR2 FURIN ZBTB7A PLAUR FGFRL1 PX…
GO_CARDIOVASCULAR_SYSTEM_DEVELOPMENT 5.32e-12 3.89e-04 71/810 ADAM8 EMILIN1 CHI3L1 HSPB6 COL1A1 COL1A2 COL5A1 ADM DLX3 ECM1 ENG ERBB2 EREG ETV2 PLXND1 STAB1 B4GALT1 SRPX2 ANG CRB2 GRN ANPEP HK2 HMOX1 HSPB1 IL6 ITGA5 ITGB2 ITGB3 JUNB LAMA5 LIF LOX LOXL1 LOXL2 LYL1 MDK MMP14 MMP19 NFATC4 NOTCH3 SERPINE1 ANGPTL4 TNFRSF12A PTGS2 RNH1 RRAS SHC1 SPI1 SPINT1 TGFB1 TGFBI THBS1 TNFAIP2 C5AR1 VEGFA VEGFB W…
GO_AMINOGLYCAN_BIOSYNTHETIC_PROCESS 6.80e-05 4.08e-04 14/114 GALNT5 CHST14 FMOD B4GALT1 GPC1 BGN SDC1 SDC4 HS3ST6 TGFB1 CHPF HS6ST1 CHST2 HS3ST3A1
GO_LYSOSOMAL_LUMEN 3.93e-05 4.09e-04 13/95 TPP1 CTSD FMOD GAA GALNS GPC1 ARSA NAGLU BGN SDC1 SDC4 SMPD1 CD74
GO_SKELETAL_SYSTEM_DEVELOPMENT 1.39e-08 4.25e-04 47/526 CHI3L1 COL1A1 COL1A2 COL6A1 COL6A2 COL6A3 COL13A1 RDH10 ECM1 ENG EFEMP1 HOXB4 HOXB6 IFITM5 SP5 LOX LOXL2 LTBP3 LTF MDK MMP9 MMP13 MMP14 MYF5 NAB2 ROR2 PITX1 FGFRL1 ACP5 POR TRPV4 BGN VWA1 SNAI1 STC1 TGFB1 TGFBI TIMP1 VDR WNT9B HMGA2 HES7 COL27A1 RUNX1 SERPINH1 GDF3 CD44
GO_CHONDROCYTE_DEVELOPMENT_INVOLVED_IN_ENDOCHONDRAL_BONE_MORPHOGENESIS 1.35e-04 4.45e-04 6/23 COL6A1 COL6A2 COL6A3 VWA1 COL27A1 SERPINH1
GO_NEGATIVE_REGULATION_OF_PROTEOLYSIS 4.06e-07 4.60e-04 34/360 GIPC1 PARK7 COL6A3 CTSZ ECM1 AMBP SFN CRB2 LTF MMP9 FURIN SERPINE1 SERPINA5 SERPINA1 PI3 PLAUR POR PRKCG PTGS2 RARRES1 RENBP SPINK1 SPINT1 THBS1 TIMP1 SERPING1 NR1H2 VEGFA CHAC1 TFPI2 SERPINH1 NOL3 CD44 SPOCK2
GO_GROWTH_PLATE_CARTILAGE_DEVELOPMENT 3.62e-05 4.78e-04 8/36 COL6A1 COL6A2 COL6A3 MMP13 POR VWA1 STC1 COL27A1
GO_REGULATION_OF_LEUKOCYTE_MIGRATION 1.36e-08 5.00e-04 26/197 ADAM8 EMILIN1 DDT ECM1 PYCARD HMOX1 ICAM1 IL1R1 IL6 RHOG LBP LGALS3 MDK MMP14 SERPINE1 RAC2 RARRES2 TRPV4 BDKRB1 CCL20 THBS1 C5AR1 VEGFA VEGFB CXCL14 CD74
GO_AMINOGLYCAN_METABOLIC_PROCESS 4.59e-05 5.26e-04 18/169 GALNT5 CHST14 FMOD GALNS B4GALT1 GPC1 NAGLU BGN SDC1 SDC4 HS3ST6 TGFB1 CHPF HS6ST1 CHST2 CD44 SPOCK2 HS3ST3A1
GO_MOLECULAR_FUNCTION_REGULATOR 6.44e-09 5.42e-04 113/1812 CCL26 ADRM1 PARK7 RLN3 WDR81 COL6A3 ADM COX6A2 CRH CTF1 CNIH3 DRD4 EREG EFEMP1 FGF3 FGF11 DKK1 FLNA CLCF1 PPP1R15A KCNE4 AMBP TBC1D10B DKKL1 GNB2 SFN METRNL CRB2 GRN PYCARD PACSIN3 OSGIN1 HSPB1 IGFBP3 IL6 IRAK1 TBC1D10C ARF1 LGALS3 ARHGDIA LIF ARHGDIG LTF MDK OSM FURIN SERPINE1 SERPINA5 GAL ANGPTL4 PCOLCE SERPINA1 PI3 FXYD1 FXYD5 FAM20A T…
GO_OXIDOREDUCTASE_ACTIVITY_ACTING_ON_SINGLE_DONORS_WITH_INCORPORATION_OF_MOLECULAR_OXYGEN 3.50e-04 5.52e-04 6/27 ALOX5 P4HA3 HPD PTGS2 TDO2 P4HA2
GO_CELL_MOTILITY 1.17e-13 5.59e-04 125/1758 PTPRU ADAM8 CCL26 CFL1 GIPC1 EMILIN1 COL1A1 COL1A2 COL5A1 LRRC15 CLDN7 ADRA2A DAPK3 DDT ECM1 ENG ERBB2 EREG FES FOXE1 PLXND1 FLNA SLC7A8 PLXNB2 SPEF1 B4GALT1 FOXB1 SRPX2 GPC1 CCR10 ANG CRB2 GRN PYCARD OSGIN1 HMOX1 HSPB1 ICAM1 IGFBP3 IGFBP5 IL1R1 IL6 ITGA3 ITGA5 ITGB2 ITGB3 ITGB4 ITGB5 ITGB7 RHOG LAMA5 LBP LGALS3 LMNA LOX LOXL2 MDK MET MMP1 MMP9 MMP14 MY…
GO_PROCOLLAGEN_PROLINE_4_DIOXYGENASE_ACTIVITY 4.55e-04 5.95e-04 3/5 P4HA3 P4HB P4HA2
GO_RECEPTOR_REGULATOR_ACTIVITY 3.13e-07 6.08e-04 44/529 CCL26 RLN3 ADM CRH CTF1 EREG EFEMP1 FGF3 FGF11 DKK1 CLCF1 DKKL1 METRNL GRN OSGIN1 IL6 LGALS3 LIF MDK OSM GAL RETN HAMP REG1A SCT CCL13 CCL20 SECTM1 STC1 TGFB1 TIMP1 UCN VEGFA VEGFB WNT2 WNT9B CALCB TNFSF12 APLN IL32 GDF15 CXCL14 GDF3 CD70
GO_FEMALE_PREGNANCY 4.99e-07 6.25e-04 23/191 KLF1 ADM CRH AMBP GJB2 IGFBP2 IGFBP5 ITGA3 ITGA5 JUNB LIF MMP7 MMP9 PTGS2 SLC2A1 STC1 THBD TIMP1 UCN SCGB1A1 VDR FOSL1 SYDE1
GO_MACROPHAGE_MIGRATION 2.59e-06 6.91e-04 11/53 EMILIN1 DDT LGALS3 MDK MMP14 ROR2 AZU1 RARRES2 TRPV4 THBS1 C5AR1
GO_EXTRACELLULAR_MATRIX_DISASSEMBLY 3.48e-05 7.19e-04 12/81 ADAM8 IL6 MMP1 MMP7 MMP9 MMP13 MMP14 MMP19 FURIN TGFB1 TIMP1 CD44
GO_CELL_JUNCTION_ORGANIZATION 1.09e-07 7.29e-04 31/293 CDH15 DAPK3 SDK1 FLNA FLNC GJB2 ANG ITGA5 ITGB4 LAMA5 MMP14 MYO1C FBLIM1 PRTN3 TRPV4 SDC4 SNAI1 TGFB1 THBS1 TRIP6 VASP VEGFA MICALL2 CNTNAP1 CAV1 RUNX1 ACTN1 CLDN9 CRB3 NUMBL CD151
GO_MULTI_MULTICELLULAR_ORGANISM_PROCESS 3.48e-07 7.31e-04 26/231 KLF1 ADM CRH MAFF AMBP B4GALT1 GJB2 DKKL1 IGFBP2 IGFBP5 ITGA3 ITGA5 JUNB LIF MMP7 MMP9 PTGS2 SLC2A1 STC1 THBD TIMP1 UCN SCGB1A1 VDR FOSL1 SYDE1
GO_GROWTH_PLATE_CARTILAGE_MORPHOGENESIS 3.64e-04 7.35e-04 5/18 COL6A1 COL6A2 COL6A3 VWA1 STC1
GO_DIOXYGENASE_ACTIVITY 4.60e-04 8.34e-04 11/91 ALOX5 P4HA3 HPD P4HB PLOD1 POR ALKBH5 PTGS2 TDO2 P4HA2 PLOD3
GO_NEGATIVE_REGULATION_OF_CELL_ADHESION 9.95e-09 8.67e-04 33/294 CEBPB B4GALNT2 COL1A1 CLDN7 ERBB2 FCGR2B PLXND1 PLXNB2 TNC IL2RA JAK3 LGALS1 LGALS3 ARHGDIA ARHGDIG MDK MMP14 ASS1 SERPINE1 PLA2G2A FXYD5 TRPV4 SDC4 SIPA1 TGFB1 TGFBI THBS1 SCGB1A1 VEGFA RUNX1 SOCS1 MYADM CD74
GO_BONE_GROWTH 4.20e-05 8.81e-04 9/47 COL6A1 COL6A2 COL6A3 ECM1 MMP13 POR VWA1 STC1 COL27A1
GO_RESPONSE_TO_MOLECULE_OF_BACTERIAL_ORIGIN 3.62e-09 9.21e-04 38/358 SPON2 CEBPB ADM DEFA5 FCGR2B SBNO2 GJB2 PYCARD ICAM1 IL6 IRAK1 JUNB JUND LBP LOXL1 LTF ASS1 NFKB2 NFKBIA SERPINE1 ACP5 PLSCR3 PTGS2 HAMP BDKRB1 TGFB1 THBD TSPO TNFRSF1B C5AR1 SCGB1A1 NR1H2 VDR VIM ZFP36 TNFRSF11A PTGES CD68
GO_PEPTIDYL_LYSINE_OXIDATION 4.55e-04 9.21e-04 3/5 LOX LOXL1 LOXL2
GO_PROTEIN_LYSINE_6_OXIDASE_ACTIVITY 4.55e-04 9.21e-04 3/5 LOX LOXL1 LOXL2
GO_TRANSMEMBRANE_RECEPTOR_PROTEIN_SERINE_THREONINE_KINASE_SIGNALING_PATHWAY 5.90e-08 9.59e-04 35/348 FSTL3 STUB1 GIPC1 EMILIN1 VASN BTBD11 COL1A2 ENG ETV2 DKK1 FMOD FKBP8 CRB2 IRAK1 ITGA3 ITGB5 VWC2 LOX LTBP2 LTBP3 ROR2 FURIN ZBTB7A PXN FAM83G TGFB1 TGFB1I1 THBS1 VIM ZYX FBXL15 FZD1 CAV1 GDF15 GDF3
GO_ACUTE_INFLAMMATORY_RESPONSE 2.03e-06 9.88e-04 16/109 ADAM8 CEBPB PARK7 FCGR2B B4GALT1 ICAM1 IL6 LBP ASS1 OSM SERPINA1 TREM1 PTGS2 HAMP TNFRSF11A PTGES
GO_REGULATION_OF_PEPTIDASE_ACTIVITY 9.49e-08 1.02e-03 41/455 ADRM1 PARK7 COL6A3 CTSD ECM1 AMBP SFN CRB2 GRN GRIN1 PYCARD GSN LTF MMP9 FURIN SERPINE1 SERPINA5 PCOLCE SERPINA1 PI3 PLAUR POR RCN3 PTGS2 RARRES1 RENBP S100A9 SPINK1 SPINT1 THBS1 TIMP1 SERPING1 VEGFA TFPI2 SOX7 CAV1 SERPINH1 TRADD NOL3 CD44 SPOCK2
GO_ENZYME_INHIBITOR_ACTIVITY 9.05e-06 1.10e-03 32/378 COL6A3 AMBP SFN CRB2 HSPB1 LGALS3 LTF FURIN SERPINE1 SERPINA5 ANGPTL4 SERPINA1 PI3 TESC TRIB3 RARRES1 RENBP RNH1 SLN SPINK1 SPINT1 TIMP1 SERPING1 UCN SCGB1A1 TFPI2 PPP1R1B SOCS1 SERPINH1 NOL3 SOCS3 SPOCK2
GO_COMPLEX_OF_COLLAGEN_TRIMERS 7.89e-04 1.12e-03 5/21 COL1A1 COL1A2 COL5A1 COL27A1 MARCO
GO_PLACENTA_DEVELOPMENT 9.20e-07 1.16e-03 20/155 CEBPB ADM DLX3 ETV2 GJB2 ANG JUNB LIF MME ETNK2 PTGS2 SNAI1 SPINT1 ST14 STC1 VDR WNT2 FOSL1 SOCS3 HS6ST1
GO_PLATELET_ALPHA_GRANULE_LUMEN 2.75e-05 1.19e-03 11/67 F13A1 ISLR SERPINE1 SERPINA1 TGFB1 THBS1 TIMP1 SERPING1 VEGFA VEGFB ACTN1
GO_DEFENSE_RESPONSE 1.81e-11 1.24e-03 119/1765 SIGLEC14 ADAM8 TCIRG1 TNIP1 CCL26 SPON2 CEBPB ARID5A LILRB3 CHI3L1 PARK7 MUCL1 ADM CRH DAPK3 DDT DEFA5 DRD4 ECM1 ELF4 EREG ABCD1 FCGR2B SBNO2 FLNA STAB1 ALOX5 BACE2 B4GALT1 IGHV4-31 METRNL GRN PYCARD GSN HMOX1 ICAM1 IGFBP4 IL1R1 IL2RA IL6 IRAK1 IRF7 ITGB2 JAK3 KCNN4 LBP LGALS3 LGALS3BP LSP1 LTF MDK MMP9 ASS1 MYO1C NEUROD2 NFATC4 NFKB2 NFKBIA OSM SERP…
GO_FORMATION_OF_PRIMARY_GERM_LAYER 1.83e-06 1.33e-03 17/121 COL5A1 COL6A1 ETV2 DKK1 CRB2 ITGA3 ITGA5 ITGA7 ITGB2 ITGB3 ITGB4 ITGB5 MMP9 MMP14 SNAI1 HMGA2 SOX7
GO_LEUKOCYTE_CHEMOTAXIS 1.90e-07 1.39e-03 26/224 ADAM8 CCL26 DDT IL6 ITGB2 LBP LGALS3 MDK SERPINE1 AZU1 RAC2 RARRES2 TRPV4 S100A9 CCL13 CCL20 THBS1 TRPM2 C5AR1 VEGFA VEGFB HSD3B7 TNFRSF11A CH25H CXCL14 CD74
GO_PLATELET_ALPHA_GRANULE 2.47e-05 1.40e-03 13/91 F13A1 ISLR ITGB3 SERPINE1 SERPINA5 SERPINA1 TGFB1 THBS1 TIMP1 SERPING1 VEGFA VEGFB ACTN1
GO_RESPONSE_TO_OXYGEN_CONTAINING_COMPOUND 3.81e-15 1.42e-03 126/1698 HCN4 ARPC1B TCIRG1 SPON2 CEBPB KLF1 CFL1 PARK7 TWF2 OVCA2 COL1A1 COL1A2 COL6A1 COL6A2 ADM CLDN7 CRH ADRA2A DEFA5 DRD4 EREG FCGR2B SDK1 FES SBNO2 DKK1 FLNA G6PD RAB11FIP5 GJB2 GNA15 FFAR1 GRB10 GRIN1 PYCARD GSN HMOX1 TNC ICAM1 IGFBP2 IGFBP5 IL6 PDX1 IRAK1 AQP9 JAK3 JUNB JUND LBP LGALS1 LOXL1 LTF MET MMP9 MMP13 MMP19 ASS1 MYO1C NF…
GO_PROTEASE_BINDING 5.53e-06 1.58e-03 17/131 ADRM1 PARK7 COL1A1 COL1A2 ECM1 PYCARD IL1R1 ITGA3 ITGB3 FURIN SERPINE1 SERPINA5 SERPINA1 BDKRB2 TIMP1 NOL3 CD70
GO_ENDODERM_DEVELOPMENT 1.57e-05 1.60e-03 12/75 COL5A1 COL6A1 DKK1 ITGA5 ITGA7 ITGB2 ITGB5 MMP9 MMP14 HMGA2 SOX7 GDF3
GO_GLUCOSE_BINDING 4.68e-04 1.61e-03 4/11 G6PD GYS1 HK2 HKDC1
GO_UDP_N_ACETYLGLUCOSAMINE_METABOLIC_PROCESS 2.23e-03 1.63e-03 4/16 B4GALNT2 RENBP UAP1L1 GFPT2
GO_ANTIFUNGAL_HUMORAL_RESPONSE 4.55e-04 1.64e-03 3/5 LTF RARRES2 FAM3A
GO_OPSONIZATION 6.82e-04 1.68e-03 4/12 SPON2 LBP PTX3 C4BPA
GO_SKELETAL_SYSTEM_MORPHOGENESIS 2.27e-06 1.78e-03 25/239 COL1A1 COL6A1 COL6A2 COL6A3 COL13A1 RDH10 HOXB4 HOXB6 IFITM5 SP5 LTBP3 LTF MMP13 MMP14 MYF5 NAB2 ROR2 ACP5 POR TRPV4 VWA1 STC1 WNT9B COL27A1 SERPINH1
GO_GROWTH_FACTOR_ACTIVITY 7.16e-06 1.79e-03 19/162 EREG EFEMP1 FGF3 FGF11 DKK1 CLCF1 GRN OSGIN1 IL6 LIF MDK OSM REG1A TGFB1 TIMP1 VEGFA VEGFB GDF15 GDF3
GO_POSITIVE_REGULATION_OF_INFLAMMATORY_RESPONSE 5.41e-07 1.82e-03 20/150 ADAM8 TNIP1 CEBPB PARK7 DDT GRN IL6 LBP MDK NFKBIA OSM SERPINE1 PLA2G2A PTGS2 TRPV4 S100A9 TGM2 TNFRSF1A TRADD TNFRSF11A
GO_LEUKOCYTE_MIGRATION_INVOLVED_IN_INFLAMMATORY_RESPONSE 9.59e-05 1.86e-03 5/14 ADAM8 ITGB2 LBP MDK S100A9
GO_RESPONSE_TO_PAIN 8.04e-05 1.91e-03 7/30 CRH PRKCG VWA1 TACR1 THBS1 TSPO UCN
GO_RESPIRATORY_SYSTEM_DEVELOPMENT 3.31e-07 1.94e-03 24/201 FSTL3 CHI3L1 CRH CTSZ RDH10 TNC IGFBP5 ITGA3 LAMA5 LIF LOX LTBP3 MME MMP14 ASS1 FGFRL1 MAP2K2 RCN3 RAB3A SREBF1 VEGFA WNT2 PLOD3 HS6ST1
GO_PROTEIN_HYDROXYLATION 1.51e-03 1.96e-03 5/24 P4HA3 P4HB PLOD1 P4HA2 PLOD3
GO_INFLAMMATORY_RESPONSE_TO_WOUNDING 6.36e-05 1.96e-03 5/13 GRN HMOX1 MDK TGFB1 TIMP1
GO_CELL_CHEMOTAXIS 8.90e-08 1.97e-03 32/306 ADAM8 CCL26 DDT CCR10 HSPB1 IL6 ITGB2 RHOG LBP LGALS3 LOX MDK MET SERPINE1 AZU1 CORO1B RAC2 RARRES2 TRPV4 S100A9 CCL13 CCL20 THBS1 TRPM2 C5AR1 VEGFA VEGFB HSD3B7 TNFRSF11A CH25H CXCL14 CD74
GO_CHONDROCYTE_DIFFERENTIATION 1.01e-05 2.05e-03 16/123 COL6A1 COL6A2 COL6A3 ECM1 EFEMP1 LOXL2 LTBP3 MDK POR VWA1 TGFB1 TGFBI HMGA2 COL27A1 RUNX1 SERPINH1
GO_PEPTIDE_CROSS_LINKING 1.28e-03 2.14e-03 6/34 F13A1 PI3 BGN TGM2 THBS1 SPOCK2
GO_GRANULOCYTE_MIGRATION 4.14e-06 2.19e-03 18/142 ADAM8 CCL26 IL1R1 ITGB2 RHOG LBP LGALS3 MDK PRTN3 RAC2 RARRES2 TRPV4 S100A9 CCL13 CCL20 THBS1 C5AR1 CD74
GO_POSITIVE_REGULATION_OF_MEMBRANE_PROTEIN_ECTODOMAIN_PROTEOLYSIS 1.40e-04 2.21e-03 5/15 ADAM8 ADRA2A PACSIN3 FURIN TNFRSF1B
GO_SPECIFIC_GRANULE 7.64e-05 2.57e-03 17/160 ADAM8 AGPAT2 CHI3L1 CHRNB4 CNN2 CTSD CTSZ ANXA11 ITGB2 LTF PLAU PLAUR RETN PTX3 TNFRSF1B TRPM2 GHDC
GO_DEFENSE_RESPONSE_TO_FUNGUS 4.57e-04 2.66e-03 7/39 SPON2 DEFA5 LTF HAMP RARRES2 FAM3A S100A9
GO_ACTIN_CYTOSKELETON 2.42e-05 2.69e-03 38/509 ARPC1B ADAM8 MYL9 GAS2L1 CFL1 TWF2 SYNPO CNN2 DAPK3 FLNA EHBP1L1 ANG GSN PARVB LSP1 MYO1C NOTCH3 FBLIM1 CORO1B PXN RAC2 TRPV4 MYO1G SLC2A1 STX1A TNNT1 TPM2 TRIP6 VASP ZYX MICALL2 CAPG PDLIM4 ACTN1 HAP1 MYADM PDLIM7 SLC9A3R1
GO_PROCOLLAGEN_PROLINE_DIOXYGENASE_ACTIVITY 2.35e-03 2.69e-03 3/8 P4HA3 P4HB P4HA2
GO_CHONDROCYTE_DIFFERENTIATION_INVOLVED_IN_ENDOCHONDRAL_BONE_MORPHOGENESIS 5.28e-04 2.78e-03 6/29 COL6A1 COL6A2 COL6A3 VWA1 COL27A1 SERPINH1
GO_RESPONSE_TO_WOUNDING 2.21e-09 2.87e-03 58/687 MYL9 COL1A1 COL1A2 COL5A1 DCBLD2 ADM ADRA2A ERBB2 EREG F13A1 FLNA MAFF B4GALT1 GNA15 GRN GSN EHD2 HMOX1 HSPB1 TNC IL6 PDX1 ITGA5 ITGB3 ITGB4 ITPR3 LGALS1 LOX MDK ACHE NINJ1 SERPINE1 SERPINA5 TNFRSF12A SERPINA1 PLAU PLAUR PPL PRKCG MAP2K2 PRTN3 CORO1B RAB3A REG1A SDC1 SDC4 TGFB1 THBD THBS1 TSPO TIMP1 SERPING1 ZFP36 TFPI2 DGKZ CAV1 CD44 CD151
GO_REGULATION_OF_NEUTROPHIL_MIGRATION 4.48e-05 2.89e-03 8/37 ADAM8 IL1R1 RHOG LBP MDK RAC2 C5AR1 CD74
GO_GLYCOSAMINOGLYCAN_BINDING 4.21e-05 2.92e-03 22/232 COL5A1 COL13A1 ENG STAB1 ANG ADAMTSL5 LTBP2 LTF MDK MMP7 SERPINA5 PCOLCE FGFRL1 AZU1 REG1A BGN SOD3 THBS1 VEGFA VEGFB CD44 SPOCK2
GO_PIGMENT_CATABOLIC_PROCESS 1.51e-03 2.94e-03 3/7 AMBP HMOX1 BLVRB
